# Supplementary material
Source: PubMed Central journal article supplement (PMC2885073)

1  
2  
3  
4

**Online Supplement:**  
**Table S-1.** Data of individual subjects

| <i>Subject No.</i> | <i>Sex</i> | <i>Age</i> | <i>P<sub>AO-Thr</sub></i> | <i>P<sub>Es-Rel</sub></i> | <i>C<sub>CW</sub></i> | <i>C<sub>L</sub></i> | <i>C<sub>RS</sub></i> | <i>P<sub>Ga-EE</sub></i> | <i>P<sub>Ga-EI</sub></i> | <i>P<sub>Es-EE</sub></i> | <i>P<sub>Es-EI</sub></i> | <i>BMI</i> | <i>V<sub>T</sub></i> |
|--------------------|------------|------------|---------------------------|---------------------------|-----------------------|----------------------|-----------------------|--------------------------|--------------------------|--------------------------|--------------------------|------------|----------------------|
| <b>OBESE</b>       |            |            |                           |                           |                       |                      |                       |                          |                          |                          |                          |            |                      |
| 1                  | f          | 44.0       | 1.13                      | 12.76                     | 0.142                 | 0.050                | 0.037                 | 11.17                    | 13.57                    | 14.54                    | 19.41                    | 41.0       | 0.69                 |
| 2                  | f          | 54.0       | 7.92                      | 11.10                     | 0.200                 | 0.043                | 0.036                 |                          |                          | 12.74                    | 16.69                    | 44.6       | 0.79                 |
| 3                  | f          | 37.0       | 13.96                     | 17.10                     | 0.141                 | 0.036                | 0.029                 | 12.25                    | 14.03                    | 18.33                    | 23.57                    | 42.0       | 0.74                 |
| 4                  | m          | 49.0       | 6.05                      | 10.76                     | 0.231                 | 0.055                | 0.044                 |                          |                          | 13.57                    | 16.86                    | 48.0       | 0.76                 |
| 5                  | m          | 56.0       | 4.36                      | 13.95                     | 0.124                 | 0.090                | 0.052                 | 7.98                     | 9.98                     | 14.55                    | 20.69                    | 40.0       | 0.76                 |
| 6                  | f          | 39.0       | 0.75                      | 10.48                     | 0.135                 | 0.053                | 0.038                 |                          |                          | 13.49                    | 17.81                    | 43.0       | 0.59                 |
| 7                  | f          | 42.0       | 10.10                     | 17.81                     | 0.255                 | 0.027                | 0.025                 | 16.99                    | 19.58                    | 17.94                    | 20.55                    | 52.0       | 0.67                 |
| 8                  | f          | 25.0       | 2.57                      | 10.09                     | 0.138                 | 0.035                | 0.028                 | 12.51                    | 13.68                    | 11.89                    | 15.81                    | 54.4       | 0.54                 |
| 9                  | m          | 40.0       | 2.89                      | 13.76                     | 0.151                 | 0.058                | 0.042                 | 10.10                    | 11.44                    | 15.02                    | 20.05                    | 48.0       | 0.76                 |
| 10                 | f          | 34.0       | 1.19                      | 8.43                      | 0.131                 | 0.034                | 0.027                 | 11.43                    | 13.45                    | 11.78                    | 15.79                    | 42.0       | 0.52                 |
| 11                 | m          | 57.0       | 9.16                      | 15.00                     | 0.080                 | 0.026                | 0.020                 | 8.98                     | 10.62                    | 18.41                    | 24.43                    | 47.5       | 0.48                 |
| 12                 | f          | 30.0       | 0.91                      | 11.71                     | 0.135                 | 0.046                | 0.034                 |                          |                          | 11.98                    | 16.69                    | 40.0       | 0.63                 |
| 13                 | m          | 44.0       | 1.13                      | 12.57                     | 0.182                 | 0.037                | 0.030                 | 12.80                    | 14.59                    | 17.01                    | 19.58                    | 43.0       | 0.47                 |
| 14                 | f          | 46.0       | 1.76                      | 9.81                      | 0.078                 | 0.051                | 0.031                 | 11.98                    | 13.60                    | 12.86                    | 21.85                    | 56.0       | 0.70                 |
| 15                 | f          | 43.0       | 1.38                      | 9.81                      | 0.124                 | 0.054                | 0.038                 | 13.41                    | 15.20                    | 13.43                    | 18.67                    | 43.2       | 0.65                 |
| 16                 | f          | 36.0       | 0.75                      | 5.33                      | 0.087                 | 0.061                | 0.036                 |                          |                          | 6.38                     | 15.71                    | 56.5       | 0.81                 |
| 17                 | f          | 36.0       | 3.23                      | 6.33                      | 0.108                 | 0.030                | 0.023                 |                          |                          | 9.51                     | 14.98                    | 44.0       | 0.59                 |
| 18                 | f          | 43.0       | 1.41                      | 8.95                      | 0.135                 | 0.047                | 0.035                 | 10.72                    | 12.02                    | 12.32                    | 17.58                    | 55.0       | 0.71                 |
| 19                 | f          | 31.0       | 1.91                      | 12.57                     | 0.205                 | 0.043                | 0.035                 | 7.85                     | 9.73                     | 11.68                    | 14.63                    | 41.4       | 0.61                 |
| 20                 | m          | 43.0       | 8.50                      | 9.24                      | 0.104                 | 0.052                | 0.035                 | 11.71                    | 13.52                    | 12.86                    | 21.20                    | 49.0       | 0.87                 |
| 21                 | m          | 48.0       | 7.69                      | 16.48                     | 0.132                 | 0.027                | 0.023                 |                          |                          | 19.89                    | 25.47                    | 49.2       | 0.74                 |
| 22                 | f          | 39.0       | 1.57                      | 14.67                     | 0.246                 | 0.029                | 0.026                 |                          |                          | 15.07                    | 17.31                    | 80.7       | 0.55                 |
| 23                 | f          | 27.0       | 1.32                      | 10.19                     | 0.165                 | 0.041                | 0.033                 | 12.10                    | 13.67                    | 13.05                    | 17.30                    | 41.9       | 0.70                 |
| 24                 | f          | 20.0       | 0.66                      | 10.29                     | 0.226                 | 0.064                | 0.050                 | 7.58                     | 9.96                     | 11.01                    | 14.21                    | 41.0       | 0.72                 |
| 25                 | m          | 62.0       | 6.96                      | 12.38                     | 0.121                 | 0.038                | 0.029                 |                          |                          | 18.10                    | 23.94                    | 51.1       | 0.71                 |

|         |   |      |      |       |       |       |       |       |       |       |       |      |      |
|---------|---|------|------|-------|-------|-------|-------|-------|-------|-------|-------|------|------|
| 26      | m | 60.0 | 4.99 | 10.76 | 0.134 | 0.057 | 0.040 |       |       | 14.19 | 19.73 | 46.4 | 0.74 |
| 27      | f | 55.0 | 1.00 | 9.81  | 0.094 | 0.071 | 0.040 |       |       | 12.29 | 19.31 | 41.3 | 0.66 |
| 28      | f | 66.0 | 7.31 | 10.29 | 0.277 | 0.032 | 0.029 | 9.22  | 10.34 | 15.73 | 17.92 | 38.0 | 0.61 |
| 29      | m | 47.0 | 0.63 | 12.86 | 0.176 | 0.053 | 0.041 |       |       | 13.58 | 17.33 | 42.0 | 0.66 |
| 30      | f | 36.0 | 2.20 | 3.00  | 0.072 | 0.062 | 0.033 | 16.98 | 20.05 | 7.11  | 15.93 | 65.7 | 0.63 |
| 31      | f | 41.0 | 1.38 | 12.43 | 0.215 | 0.031 | 0.027 | 10.75 | 12.90 | 12.90 | 15.50 | 41.6 | 0.56 |
| 32      | m | 37.0 | 2.35 | 20.48 | 0.222 | 0.021 | 0.019 | 13.28 | 14.55 | 22.02 | 24.30 | 54.2 | 0.51 |
| 33      | m | 39.0 | 6.43 | 25.71 | 0.554 | 0.043 | 0.040 |       |       | 27.20 | 28.57 | 72.9 | 0.78 |
| 34      | f | 24.0 | 2.45 | 13.57 | 0.197 | 0.034 | 0.029 |       |       | 18.28 | 21.13 | 48.9 | 0.56 |
| 35      | f | 51.0 | 0.85 | 8.57  | 0.148 | 0.086 | 0.054 | 6.67  | 9.94  | 10.40 | 16.15 | 40.5 | 0.85 |
| 36      | f | 54.0 | 0.82 | 15.67 | 0.475 | 0.041 | 0.038 |       |       | 16.05 | 17.23 | 51.3 | 0.56 |
| 37      | m | 32.0 | 0.85 | 8.95  | 0.126 | 0.064 | 0.043 | 10.98 | 12.09 | 13.75 | 19.37 | 52.3 | 0.71 |
| 38      | f | 32.0 | 2.79 | 15.90 | 0.181 | 0.035 | 0.029 | 16.98 | 20.50 | 18.38 | 23.09 | 53.5 | 0.85 |
| 39      | f | 53.0 | 2.07 | 18.33 | 0.279 | 0.018 | 0.017 | 15.90 | 15.90 | 19.99 | 19.99 | 53.0 | 0.50 |
| 40      | m | 61.0 | 1.66 | 15.90 | 0.379 | 0.038 | 0.034 | 8.93  | 8.93  | 17.98 | 17.98 | 68.2 | 0.69 |
| 41      | f | 63.0 | 1.44 | 9.81  | 0.089 | 0.030 | 0.022 |       |       | 16.67 | 16.67 | 42.7 | 0.53 |
| 42      | m | 44.0 | 1.54 | 16.90 | 0.253 | 0.029 | 0.026 | 11.00 | 11.00 | 19.25 | 19.25 | 41.8 | 0.50 |
| 43      | f | 49.0 | 2.51 | 13.05 | 0.328 | 0.024 | 0.023 | 10.44 | 10.44 | 15.18 | 15.18 | 49.9 | 0.56 |
| 44      | f | 27.0 | 1.32 | 11.24 | 0.348 | 0.030 | 0.028 | 8.99  | 8.99  | 12.55 | 12.55 | 44.2 | 0.54 |
| 45      | m | 45.0 | 3.17 | 10.19 | 0.090 | 0.035 | 0.025 | 14.36 | 14.36 | 22.00 | 22.00 | 42.9 | 0.54 |
| 46      | f | 45.0 | 1.57 | 12.33 | 0.263 | 0.027 | 0.025 |       |       | 15.82 | 15.82 | 43.0 | 0.57 |
| 47      | m | 51.0 | 1.57 | 16.00 | 0.166 | 0.048 | 0.037 |       |       | 22.57 | 22.57 | 51.4 | 0.58 |
| 48      | m | 57.0 | 3.73 | 14.98 | 0.542 | 0.032 | 0.030 |       |       | 22.50 | 22.50 | 45.9 | 0.79 |
| 49      | f | 69.0 | 1.10 | 13.05 | 0.184 | 0.039 | 0.032 |       |       | 17.37 | 17.37 | 40.2 | 0.54 |
| 50      | f | 52.0 | 1.71 | 15.62 | 0.182 | 0.050 | 0.039 |       |       | 16.93 | 20.50 | 46.1 | 0.57 |
| 51      | f | 20.0 | 1.16 | 12.76 | 0.193 | 0.031 | 0.026 | 10.88 | 10.88 | 17.77 | 17.77 | 54.8 | 0.63 |
| Mean    |   | 43.8 | 3.2  | 12.5  | 0.195 | 0.043 | 0.032 | 11.2  | 13.0  | 15.8  |       | 48.5 | 0.65 |
| SD      |   | 11.9 | 3.0  | 3.9   | 0.113 | 0.016 | 0.008 | 2.8   | 3.1   | 4.0   |       | 8.9  | 0.11 |
| Maximum |   | 69.0 | 14.0 | 25.7  | 0.554 | 0.090 | 0.054 | 17.0  | 20.5  | 28.6  |       | 80.7 | 0.87 |
| Minimum |   | 20.0 | 0.6  | 3.0   | 0.072 | 0.018 | 0.017 | 6.7   | 8.9   | 6.4   |       | 38.0 | 0.47 |

| <i>Subject No.</i> | <i>Sex</i> | <i>Age</i> | <i>P<sub>AO-Thr</sub></i> | <i>P<sub>Es-Rel</sub></i> | <i>C<sub>CW</sub></i> | <i>C<sub>L</sub></i> | <i>C<sub>RS</sub></i> | <i>P<sub>Ga-EE</sub></i> | <i>P<sub>Ga-EI</sub></i> | <i>P<sub>Es-EE</sub></i> | <i>P<sub>Es-EI</sub></i> | <i>BMI</i> | <i>V<sub>T</sub></i> |
|--------------------|------------|------------|---------------------------|---------------------------|-----------------------|----------------------|-----------------------|--------------------------|--------------------------|--------------------------|--------------------------|------------|----------------------|
| <b>CONTROLS</b>    |            |            |                           |                           |                       |                      |                       |                          |                          |                          |                          |            |                      |
| 1                  | f          | 61.0       | 0.66                      | 4.19                      | 0.086                 | 0.142                | 0.054                 |                          |                          | 5.90                     | 13.12                    | 27.1       | 0.62                 |
| 2                  | f          | 40.0       | 0.19                      | 9.33                      | 0.254                 | 0.084                | 0.063                 |                          |                          | 8.63                     | 10.59                    | 24.0       | 0.50                 |
| 3                  | f          | 42.0       | 0.60                      | 8.29                      | 0.262                 | 0.054                | 0.045                 | 5.55                     | 6.95                     | 8.48                     | 10.69                    | 29.0       | 0.58                 |
| 4                  | m          | 50.0       | 0.25                      | 7.57                      | 0.237                 | 0.072                | 0.055                 | 7.83                     | 8.36                     | 8.07                     | 11.00                    | 26.0       | 0.70                 |
| 5                  | f          | 21.0       | 0.44                      | 0.67                      | 0.292                 | 0.066                | 0.054                 | -1.50                    | -0.12                    | 1.14                     | 2.78                     | 19.2       | 0.48                 |
| 6                  | f          | 40.0       | 0.47                      | 8.19                      | 0.176                 | 0.067                | 0.048                 | 7.98                     | 9.93                     | 9.43                     | 12.38                    | 24.6       | 0.52                 |
| 7                  | m          | 39.0       | 0.88                      | 12.17                     | 0.131                 | 0.112                | 0.060                 | 3.83                     | 5.48                     | 13.75                    | 18.71                    | 24.5       | 0.65                 |
| 8                  | f          | 53.0       | 0.22                      | 7.14                      | 0.158                 | 0.102                | 0.062                 | 8.43                     | 11.79                    | 8.34                     | 11.73                    | 24.0       | 0.54                 |
| 9                  | f          | 57.0       | 0.53                      | 6.71                      | 0.539                 | 0.044                | 0.041                 |                          |                          | 8.10                     | 9.02                     | 24.7       | 0.49                 |
| 10                 | f          | 44.0       | 0.22                      | 4.76                      | 0.099                 | 0.094                | 0.048                 |                          |                          | 7.89                     | 14.95                    | 28.5       | 0.70                 |
| Mean               |            | 44.7       | 0.4                       | 6.9                       | 0.223                 | 0.084                | 0.053                 | 5.4                      | 7.1                      | 8.0                      | 11.5                     | 25.2       | 0.58                 |
| SD                 |            | 11.4       | 0.2                       | 3.1                       | 0.132                 | 0.029                | 0.007                 | 3.8                      | 4.2                      | 3.1                      | 4.1                      | 2.8        | 0.08                 |
| Maximum            |            | 61.0       | 0.9                       | 12.2                      | 0.539                 | 0.142                | 0.063                 | 8.4                      | 11.8                     | 13.8                     | 18.7                     | 29.0       | 0.70                 |
| Minimum            |            | 21.0       | 0.2                       | 0.7                       | 0.086                 | 0.044                | 0.041                 | -1.5                     | -0.1                     | 1.1                      | 2.8                      | 19.2       | 0.48                 |

5

6

7

8 **Fig. S-1.** Computational simulation of  $V_L$  change as a function of  $P_{AO}$  with a given rate of  $P_{AO}$  increase,  
9 respiratory resistance and compliance:  $dt = 0.01$  s,  $dP_{AO}/dt = 4$  cmH<sub>2</sub>O/s,  $R=15$ ,  $C_{RS} = 0.02$ . (Higher rate of  
10 pressure increase and resistance would increase  $P_{AO-Thr}$ , and higher compliance would decrease  $P_{AO-Thr}$ .)

11 Note that at  $P_{AO} = 1.24$  cmH<sub>2</sub>O the lung volume has increased by 0.01 liter from FRC.

12

13

14

15

16

17

18

19

20

21

22

23

24

25

26

27

28

29

30

31

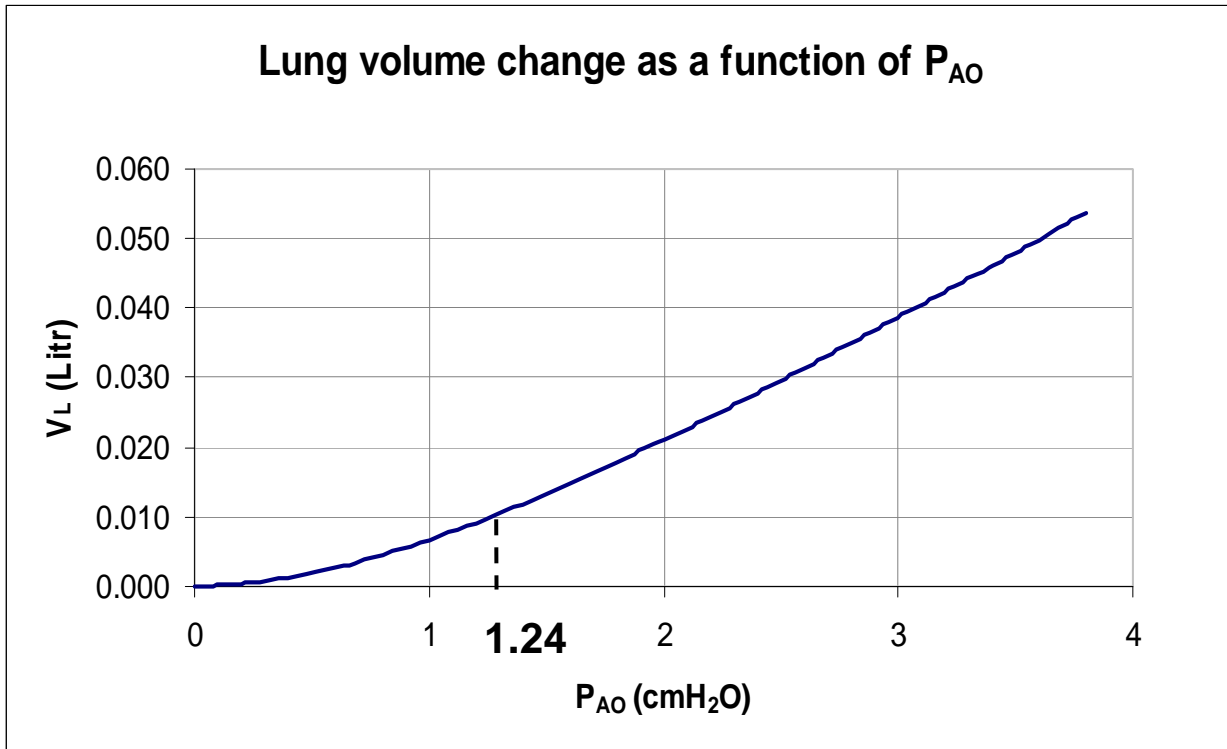

Supplement: 91356.2008_1.pdf [file 91356.2008_1.pdf]
